# Supplementary material
Source: PubMed Central journal article supplement (PMC3887341)
Supplement: NIHMS56239-supplement-01.pdf [file NIHMS56239-supplement-01.pdf]

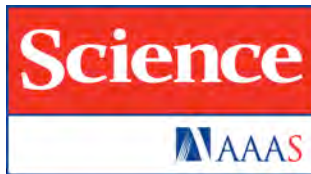

Supplementary Materials for  
**Transposition driven genomic heterogeneity in the *Drosophila* brain**

Paola N. Perrat, Shamik DasGupta, Jie Wang, William Theurkauf, Zhiping Weng,

Michael Rosbash and Scott Waddell

correspondence to: [scott.waddell@cncb.ox.ac.uk](mailto:scott.waddell@cncb.ox.ac.uk)

**This PDF file includes:**

Materials and Methods  
Author contributions  
Figs. S1 to S6  
Tables S1 to S10  
References

## Materials and Methods

### Fly strains

Fly stocks were raised on standard cornmeal food at 25°C and 40-50% relative humidity. The MB-LexA (aka 247-LexA) flies are described (45). MB-LexA labels most MB neurons but misses a significant population in the  $\alpha\beta$  core. We combined c305a-GAL4, c739-GAL4 and NP1131-GAL4 with MB-LexA to generate the driver lines c305a-GAL4; MB-LexA/TM3Sb, c739-GAL4; MB-LexA/TM3Sb and NP1131-GAL4; MB-LexA/TM3Sb, which label the MB  $\alpha'\beta'$ ,  $\alpha\beta$  and  $\gamma$  neurons respectively. We combined lexAop-FLP (15) with UAS>STOP>CD8::GFP (46) to generate lexAop-FLP; UAS>STOP>CD8::GFP flies. We crossed lexAop-FLP; UAS>STOP>CD8::GFP females with males of the driver lines for the immunohistochemistry and gene expression profiling experiments. elavGAL4/MBGAL80;uas-CD8::GFP flies that label most neurons other than MB neurons were generated by crossing elavGAL4/CyO with MBGAL80;uas-CD8::GFP flies. MBGAL80 flies are described (12). Transheterozygous  $aub^{HN2}/aub^{QC42}$  flies were generated by crossing  $aub^{HN2}/CyO$  and  $aub^{QC42}/CyO$  flies (33). Transheterozygous  $ago3^{12}/ago3^{13}$  flies were generated by crossing  $ago3^{12}/TM6Tb$  and  $ago3^{13}/TM6Tb$  flies (19). Transheterozygous  $armi^1/armi^{72.1}$  flies were generated by crossing  $armi^1/TM3$  to  $armi^{72.1}/TM3$  flies (34). The  $ago2^{414}$  and  $dcr-2^{L811fsX}$  flies are described (22). The wild-type *Drosophila* control strain used in the QRT-PCR experiments is w1 (19). *D. sechellia* and *D. erecta* were obtained from Joel Levine (University of Toronto) and *D. pseudoobscura* from Aki Ejima (Brandeis University). Oregon R flies used for ovary sequencing are those in (35).

### Immunohistochemistry

Fly brains were dissected in chilled 1X Phosphate Buffered Saline (PBS) (1.86 mM  $NaH_2PO_4$ , 8.41 mM  $Na_2HPO_4$ , and 175 mM NaCl), 0.1% Triton X-100 (PBS-T) and fixed for 30 minutes in chilled 4% paraformaldehyde in 1XPBS. After fixation, brains were rinsed four times in PBS-T for 15 minutes at room temperature. The following primary antibodies were added to 1:200 final concentration in PBS-T and brains were incubated overnight at 4°C with gentle rocking: rabbit anti-Aub (19), rabbit anti-Ago3 (19), and mAb anti-GFP (Invitrogen). Brains were rinsed in PBS-T and incubated overnight with the appropriate secondary antibodies (Jackson Laboratories). Confocal analysis was performed on a Zeiss LSM 5 Pascal confocal microscope. Confocal stacks were processed using ImageJ and Adobe Photoshop.

### Cell sorting

RNA isolation and preparation protocol was performed as described previously (18). 50-60 brains were dissected from ~5 day old flies into ice-cold modified dissecting saline (9.9 mM HEPES-KOH buffer, 137 mM NaCl, 5.4 mM KCl, 0.17 mM  $NaH_2PO_4$ , 0.22 mM  $KH_2PO_4$ , 3.3 mM glucose, 43.8 mM sucrose, pH 7.4) containing 50  $\mu$ M d(-)-2-amino-5-phosphono-valeric acid (AP5), 20  $\mu$ M 6,7-dinitroquinoxaline-2,3-dione (DNQX), 0.1  $\mu$ M tetrodotoxin (TTX), and immediately transferred them into modified SM<sup>active</sup> medium (SM<sup>active</sup> medium containing 5 mM Bis-Tris, 50  $\mu$ M AP5, 20  $\mu$ M

DNQX, 0.1  $\mu$ M TTX) on ice. Brains were digested with l-cysteine-activated papain (50 units/ml in dissecting saline; Worthington) for 30 minutes at 25°C. Digestion was stopped with five volumes of medium, and brains were washed twice with the chilled medium. Brains were triturated with a flame-rounded 1,000  $\mu$ l pipetter tip with filter until most of the tissues were dissociated to single cells. The resulting cell suspension was filtered with a 40  $\mu$ m Nylon Cell Strainer (BD Falcon). GFP-positive cells were sorted using a BD FACSAria Flow Cytometer with FACSDiVa 6.1.1 software. The quality of purified GFP-labeled material was verified by microscopy.

### Gene expression analysis

Total RNA was extracted from approximately 10,000 GFP-positive cells and poly(A) RNA was amplified by two-cycle linear amplification as previously described (14) and hybridized to a GeneChip *Drosophila* Genome 2.0 array (Affymetrix). Four biological replicates were profiled for each cell type. Scanned Affymetrix image data were processed with the Affymetrix GCOS software to convert to probe level signals. The probe signal files were then processed in CARMAweb (16) (<https://carmaweb.genome.tugraz.at/carma/index.jsp>) using the GCRMA algorithm to normalize and calculate summary values for each probe set. CARMAweb tools were used to identify differentially expressed genes. Genes from each population of cells with average value of replicates  $\geq 7.0$  were selected and compared between populations. Genes with a  $\geq 2$ -fold change difference between populations are reported.

### Real-Time PCR

Total RNA from adult fly heads was isolated with Trizol (Invitrogen) and cleaned with RNeasy Micro Kit (Qiagen) with DNase I treatment. RNA (1  $\mu$ g) was reverse transcribed using the High Capacity cDNA Reverse Transcription Kit (Applied Biosystems) and oligo(dT)<sub>12-18</sub>. The cDNA was used for quantitative real-time PCR with ABI PRISM<sup>®</sup> 7000 Sequence Detection System (Applied Biosystems) with standard cycling parameters (2 min at 50 °C, 10 min at 95 °C, and 40 alternate cycles of 15 s at 95 °C and 60 s at 60 °C). The PCR mixture contained TaqMan<sup>®</sup> Gene Expression Master Mix and the appropriate Gene Expression Assay (Applied Biosystems). TaqMan custom-made qPCR assays were ordered for all transposons assayed. GAPDH (AB: Dm01841185\_m1) was used as endogenous control for normalization of each gene ( $\Delta C_T$  value). The increase in expression ( $\Delta\Delta C_T$  value) was calculated and transformed to the exponential scale.

### Deep-sequencing

DNA was prepared for whole genome sequencing by shearing material prepared from approximately 5000 sorted cells (GFP-positive and GFP-negative samples) or 10  $\mu$ g DNA from embryos. Shearing was performed using 5 cycles of 20 pulses spaced by 30 seconds using a Sonifier 450 (Branson) with the following settings: Output 1, Duty Cycle 50%. The sequencing library was prepared as previously described (47) involving DNA end repair, addition of A bases to the 3' ends and adapter ligation (Illumina PE Adapter Oligo Mix). Adapter-ligated products were purified using the DNA Clean&Concentrator-5 kit (Zymo Research) and amplified by PCR using Phusion DNA polymerase (New England Biolabs) for 30 cycles using the inPE PCR primers 1.0 and 2.0, and individual

index primers for each sample (Illumina). PCR fragments of the desired range (200-400 base pairs) were purified using a 2% agarose gel. DNA quality was assessed and quantified using a High Sensitivity DNA Assay on a 2100 Bioanalyzer (Agilent Technologies). Computational identification of transposon insertion sites was performed as previously described (35). In total, 12.8M, 8.4M and 58.8M 100-nt paired-end reads were obtained for  $\alpha\beta$  neurons (GFP-positive), other cells in the brain (GFP-negative), and embryos. Reads were aligned against the *Drosophila* reference genome (not masked for repeats) using the BWA algorithm (48), allowing insertions, deletions, and up to three mismatches per read (100 nt). For the three datasets, 2.1M, 2.5M, and 23.3M pairs of reads map to the reference genome properly, i.e., both reads in the pair map and their mapped genomic locations are within 500 nt. For the detection of transposon insertions that were in the experimental genome but not in the reference genome, discordant read pairs were identified with one read mapping to a location in the reference genome and the other mapping to a transposon sequence. Oregon R strain ovarian and embryo DNA was sequenced as described previously (35) and new insertions in the ovary sample were determined by comparison to embryo sequence, essentially as above for neurons. 33.1M and 59.2M pairs of reads properly mapped to the reference genome for ovary and embryo sequence respectively.

### **Author contributions**

S.W., P.N.P. and M.R. conceived the idea of this project. S.D. and Y.S. contributed to the development of the intersectional strategy and S.D. provided the intersectional images. W.T. suggested deep-sequencing, provided the ovary data and aided J. W and Z.W. in the computational process required to map transposon insertions. P.N.P designed and performed all other experiments; fly genetics, cell type-specific purification and expression profiling, immunostaining and molecular biology with advice from S.W. and M.R. throughout. S.W. and P.N.P wrote the manuscript with assistance from the other authors.

**Fig. S1.**

Punctate Stellate labeling in the mushroom body calyx. Immunostaining for Ste (magenta) in the brain labels discrete and variable patterns of puncta (white arrow heads) within the MB calyces of flies. The puncta colocalize with the dendrites of MB  $\alpha\beta$  neurons (green). Scale bar 10 $\mu$ m.

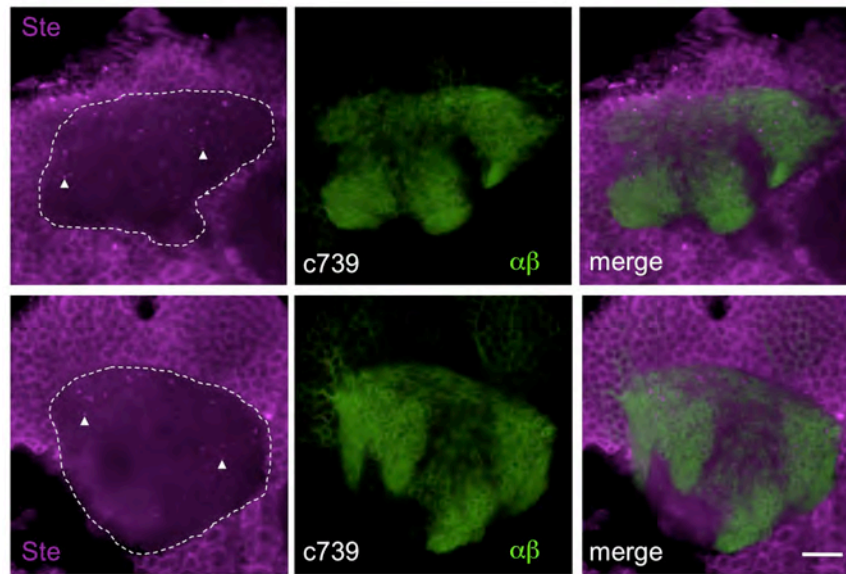

**Fig. S2.**

Aub labels the  $\alpha'\beta'$  and  $\gamma$  lobes of the mushroom body and the ellipsoid body of the central complex. Aub immunostaining labels the processes of  $\alpha'\beta'$  and  $\gamma$  neurons more strongly than those of the  $\alpha\beta$  neurons in the MB lobes. **(A)** Aub immunostaining (magenta) does not co-localize with the  $\alpha\beta$  neurons labeled by c739 (green). **(B)** Aub immunostaining (magenta) co-localizes with the  $\alpha'\beta'$  neurons labeled by c305a (green) and **(C)** the  $\gamma$  neurons labeled by NP1131 (green). **(D)** Aub also strongly labels the ellipsoid body of the central complex (dashed circle). The MB neurons are labeled with FLP-out GFP as in Fig. 1. Scale bar 20 $\mu$ m.

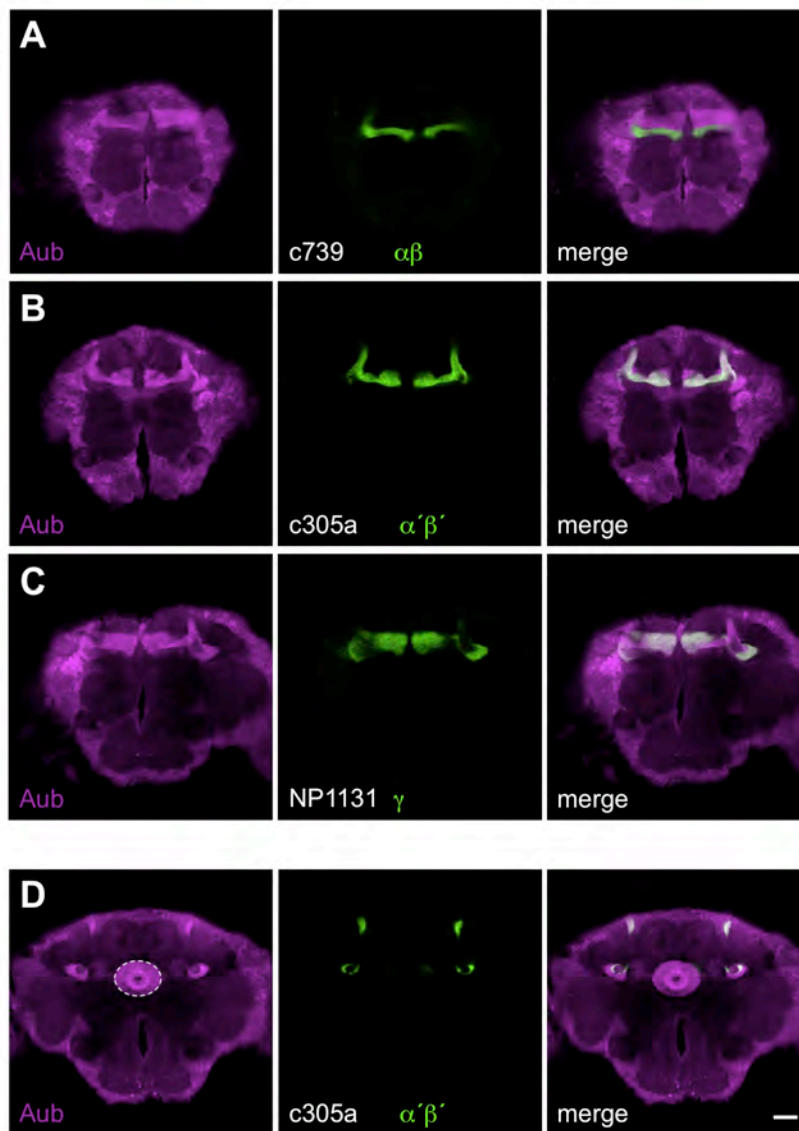

**Fig. S3.**

Ago3 does not label the mushroom body lobes or the ellipsoid body. Ago3 immunostaining does not colocalise in the MB lobes with (A) the  $\alpha\beta$  neurons labeled by c739, (B) the  $\alpha'\beta'$  neurons labeled by c305a or (C) the  $\gamma$  neurons labeled by NP1131 (green). (D) Ago3 immunolabeling is also notably absent from the ellipsoid body of the central complex (dashed circle). The MB neurons are labeled with FLP-out GFP as in Fig. 1. Scale bar 20 $\mu$ m.

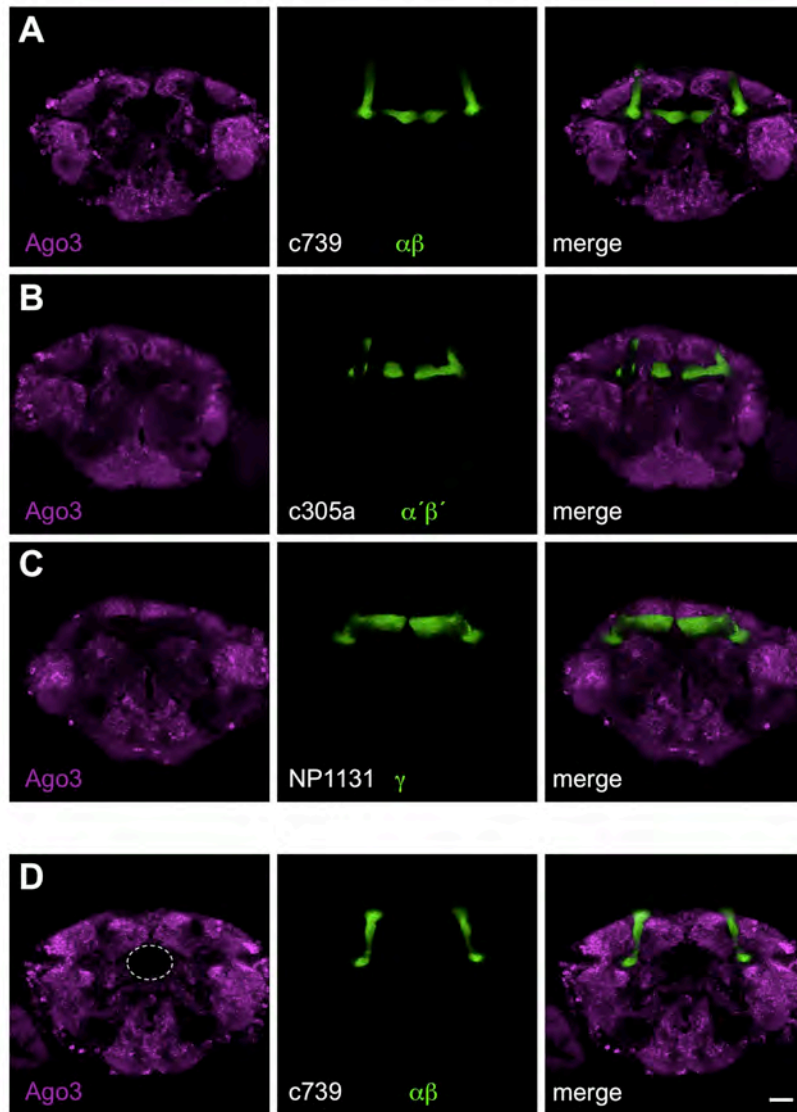

**Fig. S4.**

Aub and Ago3 indicate similarly organized neurons in the MB peduncle of other Drosophilids. Immunostaining of adult brains from *D. erecta*, *D. sechellia* and *D. pseudoobscura*. Cross sections through the peduncle reveal weaker Aub labeling in the centre of the peduncle than the periphery. Ago3 also labels the periphery of the peduncle and discrete bundles in the centre. Both of these patterns are consistent with those seen in *D. melanogaster* (Fig. 3) where Aub preferentially labels  $\alpha'\beta'$  and  $\gamma$  neurons and Ago3 labels  $\gamma$  and  $\alpha\beta$  core neurons. Scale bar 20 $\mu$ m.

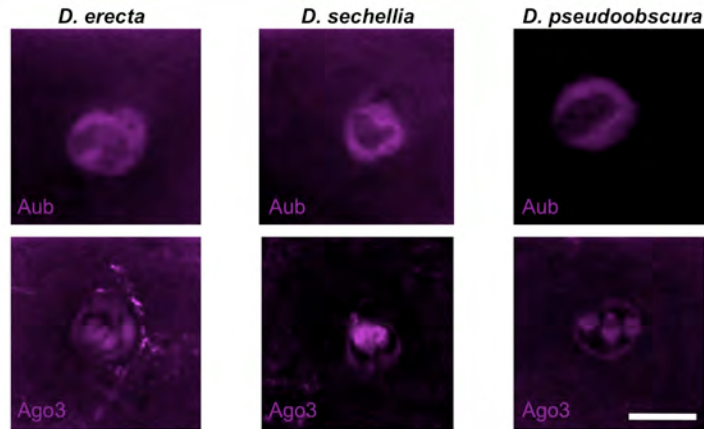



**Fig. S5.**

Transposon expression is elevated in heads from siRNA mutant flies. Quantitative RT-PCR of transposon transcripts from wild-type, *ago2*<sup>414</sup> and *dcr-2*<sup>L811fsX</sup> mutant fly heads. Values normalized to those from wild-type flies. Asterisks denote significant increase from wild-type samples,  $P < 0.05$  (T-test).

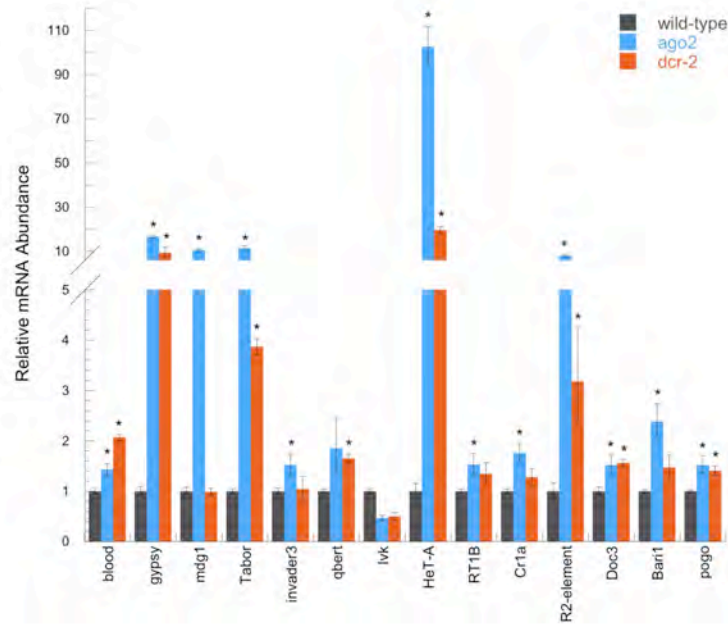

**Fig. S6.**

Distribution of *de novo* transposon insertions in  $\alpha\beta$  neurons and in the rest of the brain sample with respect to neighboring genes. Numbers identified in each category are listed above each column.

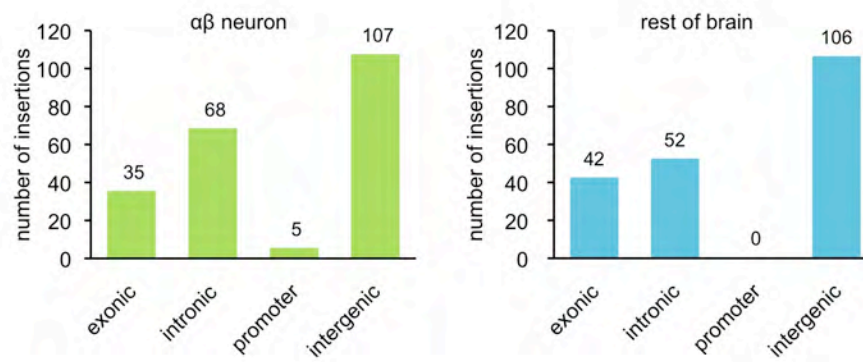

**Table S1.**

Raw microarray data and analysis illustrated in Fig. 2.

| probeset_id   | symbol                 | a'b' replicates |             |             |              | gamma replicates |            |            |             | ab replicates |             |             |             | No MBs replicates |              |              |              | Fold Change |              | Ttest       |                | Ttest (-log10 scale) |                |
|---------------|------------------------|-----------------|-------------|-------------|--------------|------------------|------------|------------|-------------|---------------|-------------|-------------|-------------|-------------------|--------------|--------------|--------------|-------------|--------------|-------------|----------------|----------------------|----------------|
|               |                        | 305 A_CEL       | 305 B_CEL   | 305 C_CEL   | 305 D_CEL    | 1131 B_CEL       | 1131 C_CEL | 1131 D_CEL | 1131 E_CEL  | 739 A_CEL     | 739 B_CEL   | 739 D_CEL   | 739 E_CEL   | No MBs A_CEL      | No MBs B_CEL | No MBs D_CEL | No MBs E_CEL | FC ab/MB    | FC ab/NoMB   | Ttest ab/MB | Ttest ab/No MB | Ttest ab/MB          | Ttest ab/No MB |
| 1628230_x_at  | CG31001                | 2.750484217     | 3.108032696 | 2.94586156  | 5.97188175   | 4.80837          | 2.480156   | 2.604539   | 5.565506    | 4.439910633   | 8.508112912 | 9.065416587 | 10.07394845 | 3.919307          | 2.498804     | 2.512647     | 2.4963       | 20.78532273 | 39.39887817  | 0.034036683 | 0.02166577     | 1.468052772          | 1.664252866    |
| 1630855_s_at  | Ste12DOR               | 5.161472124     | 6.546259868 | 3.954350984 | 3.234210561  | 5.691621         | 3.948884   | 4.138842   | 5.327253    | 8.34049988    | 8.092136657 | 10.07805077 | 10.06321708 | 6.340589          | 3.933091     | 3.867659     | 4.614921     | 20.49402068 | 21.89623777  | 0.00481364  | 0.001331669    | 3.317526032          | 2.875114757    |
| 1623831_x_at  | Bar1 (1)               | 5.423630917     | 4.175178849 | 4.26546081  | 3.801391134  | 6.060234         | 3.275831   | 3.989559   | 5.074648    | 8.008802173   | 6.145595567 | 11.04043127 | 10.90354707 | 7.970912          | 3.796635     | 3.449232     | 3.611764     | 19.76435515 | 20.85193403  | 0.025600924 | 0.031740163    | 1.591744364          | 1.498390854    |
| 1626867_at    | Hk3 (1)                | 5.327610847     | 4.739536426 | 2.946715384 | 4.342519819  | 6.81095          | 3.732795   | 4.619836   | 6.939464    | 7.593281615   | 7.345697694 | 11.16509587 | 11.64169902 | 7.720578          | 6.611354     | 5.689304     | 3.113973     | 19.0802426  | 17.63294231  | 0.025595534 | 0.033615619    | 1.59385804           | 1.476700812    |
| 1635715_at    | Hs4                    | 7.054680505     | 5.232079254 | 3.048681054 | 3.827472135  | 5.451306         | 5.057373   | 5.40309    | 8.129166    | 7.730341208   | 7.21392797  | 10.52541215 | 10.67352945 | 5.598864          | 4.894795     | 5.005832     | 4.515849     | 16.08477332 | 16.35963259  | 0.013782272 | 0.01823237     | 1.860679191          | 1.739160041    |
| 1635666_at    | Hs2B (1)               | 6.92908543      | 6.525399132 | 3.512701039 | 6.687268506  | 7.115474         | 5.706132   | 6.243682   | 8.429464    | 8.616270623   | 9.914799688 | 12.03452738 | 11.98302521 | 6.950037          | 5.993195     | 6.389337     | 6.677115     | 13.71261639 | 21.62436479  | 0.007892312 | 0.006730332    | 2.102795733          | 2.115185812    |
| 1629740_at    | Hs1 (1)                | 8.932577888     | 8.602257623 | 3.947352787 | 9.886514427  | 7.83409          | 5.005306   | 7.326277   | 6.169507    | 10.36214912   | 9.243435998 | 12.00203848 | 11.97326236 | 7.571815          | 5.759939     | 5.163635     | 6.269989     | 12.87740417 | 26.14591202  | 0.004785117 | 0.001878442    | 2.32010742           | 2.747525172    |
| 1638308_s_at  | Hs3 (2)                | 7.17031798      | 7.267408429 | 5.524718172 | 8.310408644  | 8.430632         | 7.062304   | 6.794978   | 8.425312    | 9.540654502   | 9.334820332 | 12.36127283 | 12.51162805 | 8.914674          | 5.96791      | 6.625275     | 4.967673     | 11.82586859 | 19.94822436  | 0.018733268 | 0.011648114    | 1.727386465          | 1.933744379    |
| 1623281_s_at  | Hs2B (2)               | 5.388329924     | 6.089971672 | 4.021206207 | 5.099143562  | 5.331999         | 4.923526   | 4.444916   | 5.94268     | 7.044917602   | 7.753855303 | 10.26436696 | 9.692351258 | 5.378637          | 5.07682      | 5.356065     | 4.932511     | 11.58070545 | 11.33619464  | 0.014589977 | 0.01860206     | 1.835945403          | 1.730438965    |
| 1627112_s_at  | Bar1 (2)               | 6.552343274     | 8.517532155 | 4.47885604  | 8.453778261  | 7.94547          | 5.0448     | 6.104266   | 4.912055    | 9.965121815   | 10.28799956 | 10.5053388  | 10.08444575 | 6.365792          | 4.097193     | 3.962808     | 3.773072     | 11.00463119 | 42.5610026   | 0.00453782  | 0.000736686    | 3.343153203          | 3.132717683    |
| 1626205_s_at  | G6                     | 3.848224973     | 3.781624455 | 2.862366312 | 3.883047324  | 4.147621         | 3.014934   | 2.958287   | 4.519435    | 6.495785611   | 3.412588581 | 9.707362693 | 8.53688128  | 3.284131          | 2.853763     | 3.546646     | 2.773656     | 10.64306044 | 15.17953342  | 0.08102056  | 0.064058002    | 1.055011473          | 1.193434748    |
| 1623349_x_at  | RT1B                   | 7.269100507     | 6.937024237 | 5.977891307 | 6.595116876  | 7.404572         | 7.292809   | 7.502578   | 8.327297    | 6.629103981   | 9.043961754 | 11.87843651 | 11.82593943 | 9.748104          | 7.713699     | 7.542569     | 7.882655     | 10.15550659 | 5.17816942   | 0.01489393  | 0.002275632    | 1.178628521          | 1.2175687856   |
| 1631349_s_at  | Tab1                   | 7.727651004     | 7.524563707 | 6.554575776 | 10.64199832  | 10.255897        | 5.433161   | 7.80441    | 6.04311     | 9.315967723   | 11.46353977 | 11.42580003 | 11.47184711 | 8.390501          | 5.899294     | 5.499959     | 5.612837     | 9.006322068 | 23.72705367  | 0.00419104  | 0.002272782    | 2.37767818           | 2.643337479    |
| 1630585_s_at  | HeT-A (1)              | 6.782952399     | 6.105841958 | 4.166968286 | 6.626571833  | 6.051374         | 5.939808   | 5.934395   | 6.9269      | 6.648087827   | 7.26395551  | 10.66719436 | 10.19324827 | 6.168085          | 6.106094     | 4.856809     | 4.475001     | 8.997474251 | 17.94455514  | 0.019114476 | 0.006672863    | 1.826990703          | 1.36921317     |
| 1623145_s_at  | PlexinB pseudogene (1) | 6.662679974     | 6.004903544 | 3.877281351 | 6.147596001  | 7.805013         | 4.891025   | 6.273921   | 4.249171    | 9.043219687   | 7.855353022 | 9.975315887 | 8.977144481 | 4.626327          | 4.688568     | 4.623283     | 4.816604     | 7.856077493 | 16.2703713   | 0.000281342 | 0.000625728    | 3.550765843          | 3.203614655    |
| 1629641_s_at  | CG32850 (1)            | 4.488626904     | 5.007900988 | 3.33164895  | 5.684732975  | 6.67619          | 4.197349   | 4.967805   | 4.242637    | 7.325059578   | 9.128581266 | 7.954331242 | 7.554195251 | 5.204239          | 4.967805     | 3.211964     | 3.341419     | 6.78671884  | 13.39248675  | 0.000761912 | 0.000558084    | 3.118095256          | 3.253000474    |
| 1631447_s_at  | Hs1 (1)                | 8.591447007     | 8.957929275 | 5.008287084 | 9.76132533   | 8.911817         | 7.05676    | 7.973798   | 8.174473    | 8.765417787   | 10.34263301 | 11.9567601  | 11.85146425 | 8.452103          | 6.403026     | 5.466868     | 6.991583     | 7.18196105  | 17.75832682  | 0.005717756 | 0.002598519    | 2.422774392          | 2.585274819    |
| 16341464_s_at | wk (1)                 | 4.113118092     | 6.42792366  | 7.383066634 | 8.896891445  | 5.803326         | 5.945558   | 5.743512   | 6.232602    | 6.656472259   | 9.698385394 | 9.996674933 | 10.12054925 | 7.244273          | 5.40108      | 5.414946     | 5.197481     | 7.138875752 | 15.09364361  | 0.000859537 | 0.000806199    | 3.067761011          | 3.093557796    |
| 1625195_s_at  | midg1                  | 7.732770347     | 9.125102534 | 7.131230515 | 7.474194843  | 8.609392         | 7.691796   | 7.493817   | 7.632168    | 10.00668145   | 10.58229868 | 11.24039611 | 11.80469547 | 7.305291          | 6.001374     | 5.06755      | 6.109862     | 7.069299479 | 23.58828562  | 5.568585-05 | 0.000276432    | 4.254688889          | 3.360035354    |
| 1630452_at    | transib3               | 7.791952141     | 8.245470436 | 7.738096496 | 10.770794902 | 8.917823         | 6.38563    | 7.83314    | 6.599947    | 9.889805432   | 10.14771856 | 11.07407945 | 11.0796975  | 6.448621          | 6.003394     | 4.975068     | 5.390919     | 6.878192278 | 40.47342636  | 0.00340211  | 0.002036541    | 2.862489162          | 3.67767514     |
| 1627745_s_at  | wk (2)                 | 6.24905598      | 6.690930128 | 6.752211137 | 9.310272631  | 8.667096         | 5.912318   | 6.621723   | 6.110378    | 8.329007058   | 10.63986311 | 10.49971966 | 10.20937125 | 7.837039          | 5.778275     | 5.496041     | 5.837945     | 6.75166544  | 12.83638063  | 0.00540783  | 0.002883554    | 2.266977009          | 2.540071903    |
| 1644006_s_at  | Crla                   | 7.80733392      | 8.962528129 | 6.76736892  | 8.969036558  | 6.823506         | 7.263444   | 6.896079   | 9.514741456 | 10.43948622   | 11.24463047 | 11.10423724 | 8.61642     | 6.759861          | 6.832143     | 6.935796     | 6.547737428  | 10.67289824 | 10.0120166   | 0.00193489  | 0.002975316    | 2.975316671          | 3.122536671    |
| 1623575_s_at  | Felement               | 4.812765264     | 6.910016196 | 4.010626913 | 5.322562314  | 4.869178         | 2.833016   | 4.496545   | 2.603482    | 6.963013187   | 5.771074672 | 6.942273395 | 7.067611128 | 4.062323          | 2.426925     | 2.533144     | 2.895808     | 6.299588189 | 17.84884227  | 0.000755511 | 0.000549692    | 3.121759207          | 3.259806863    |
| 1632295_s_at  | Doc2                   | 9.12550011      | 9.937059268 | 8.927501147 | 11.347080016 | 10.499423        | 4.855724   | 9.325697   | 6.706635    | 10.68173079   | 12.32417668 | 12.57351387 | 12.40889395 | 10.573059         | 8.393798     | 8.490272     | 7.972436     | 6.002804058 | 9.0790298935 | 0.002704172 | 0.006645681    | 2.179760492          | 2.157860492    |
| 1630420_x_at  | huggins                | 5.191184816     | 4.147092932 | 2.810984986 | 5.056727291  | 6.760737         | 3.215531   | 5.363317   | 5.409498    | 5.219244788   | 9.136012365 | 8.097289872 | 8.37613421  | 6.460852          | 4.710974     | 4.427994     | 4.727143     | 5.731582674 | 15.93709295  | 0.027340231 | 0.04921713     | 1.563197825          | 1.37788358     |
| 1630934_x_at  | R2-element             | 5.270138491     | 8.635194985 | 7.722218178 | 9.520945566  | 6.400255         | 8.265829   | 7.94057    | 8.767086    | 9.964753399   | 11.39041309 | 11.3071834  | 11.19719526 | 11.202932         | 10.8212      | 11.066428    | 11.066428    | 5.725020329 | 10.07054923  | 0.01100336  | 0.029727613    | 2.564874669          | 3.00989483     |
| 1627899_x_at  | Ucrh                   | 5.715951643     | 6.251477126 | 5.036763949 | 5.781445111  | 6.774356         | 7.149992   | 5.372248   | 6.324225    | 8.705295768   | 7.680291305 | 9.460789453 | 9.121575033 | 5.695259          | 2.909407     | 3.259708     | 3.701523     | 5.523275291 | 28.85212931  | 0.001708145 | 0.001755221    | 2.767475371          | 2.929843411    |
| 1640702_x_at  | PlexinB pseudogene (2) | 5.838303911     | 5.537307064 | 5.841388617 | 9.071992912  | 7.302444         | 8.95943    | 7.615844   | 5.644073    | 8.65165906    | 9.764268104 | 9.473226322 | 9.12849323  | 5.51091           | 6.282998     | 3.732864     | 4.992703     | 5.320361973 | 25.36609852  | 0.000781061 | 0.004856676    | 4.024170472          | 4.024170472    |
| 1625877_s_at  | CG40271                | 7.42769237      | 8.68591639  | 6.628961437 | 4.986625751  | 7.380271         | 6.47914    | 7.098056   | 6.48639     | 8.805901209   | 9.528178143 | 10.61374852 | 9.832700449 | 8.564255          | 6.330894     | 6.193006     | 6.201037     | 5.13211444  | 7.324557382  | 0.001791008 | 0.008434086    | 2.746902574          | 2.073922855    |
| 1625907_s_at  | Doc3                   | 5.756287358     | 5.263518159 | 4.137824116 | 3.431772925  | 6.384746         | 7.405033   | 6.470523   | 6.470523    | 6.450650023   | 9.948089847 | 8.818415256 | 9.908307057 | 5.1466616         | 4.927105     | 5.229884     | 5.894799     | 4.799232956 | 6.403116774  | 0.025996435 | 0.002384501    | 1.585086208          | 1.957873377    |
| 1635135_at    | roo                    | 8.983301869     | 9.97689871  | 7.587740349 | 10.97001886  | 9.347114         | 8.279764   | 9.036076   | 8.782942    | 11.24616651   | 11.36942572 | 11.38844381 | 11.2355401  | 8.706187          | 8.374763     | 7.435548     | 8.481967     | 4.561195676 | 3.45669486   | 0.000502155 | 0.001404768    | 3.299162373          | 2.852395369    |
| 1641210_s_at  | qbrst                  | 5.517911161     | 6.75889294  | 4.729016373 | 5.966258828  | 6.267848         | 5.165433   | 4.918646   | 4.756537    | 7.577123593   | 7.456490767 | 8.251013779 |             |                   |              |              |              |             |              |             |                |                      |                |

**Table S2.**

Summary table of deep-sequencing data analyzed in Fig. 4.

|                                                               | MB<br>neuron | non-MB<br>neuron | embryo     | Oregon R<br>ovary | Oregon R<br>embryo |
|---------------------------------------------------------------|--------------|------------------|------------|-------------------|--------------------|
| read pairs                                                    | 6,413,050    | 4,226,518        | 29,399,946 | 34,363,229        | 62,590,728         |
| properly paired pairs                                         | 2,078,839    | 2,511,774        | 23,309,307 | 33,103,300        | 59,244,707         |
| non properly paired pairs                                     | 4,334,211    | 1,714,744        | 6,090,639  | 1,259,929         | 3,346,021          |
| N of insertions                                               | 1,107        | 1,271            | 3,890      | 7,683             | 8,400              |
| genome coverage (fold)                                        | 3            | 4                | 34         | 48                | 87                 |
| N of insertions not in<br>embryo                              | 234          | 219              | -          | 3,860             | -                  |
| N of insertions not in<br>embryo at 1-fold genome<br>coverage | 129          |                  |            |                   |                    |

**Table S3.**

Genomic location of exonic, intronic and promoter insertions in  $\alpha\beta$  neurons. TSS, transcription start site.

| exonic insertions |          |          |                        |        |                  |                         |                                                       |
|-------------------|----------|----------|------------------------|--------|------------------|-------------------------|-------------------------------------------------------|
| chr               | start    | end      | transposonName         | strand | transposonStrand | gene                    | full name                                             |
| chr2L             | 2972995  | 2973095  | FBgn0000004_17.6       | -      | antisense        | FBgn0004584,FBgn0260639 | Recombination repair protein 1; gamma-Tubulin at 23C  |
| chr2L             | 4682874  | 4682974  | FBgn0005384_3518       | -      | sense            | FBgn0031620             |                                                       |
| chr2L             | 7233939  | 7234039  | FBgn0044355_Quasimodo  | +      | antisense        | FBgn0259111             | Na[+]-driven anion exchanger 1                        |
| chr2L             | 15034699 | 15034799 | FBgn0000481_Doc        | -      | sense            | FBgn0260446             | metabotropic GABA-B receptor subtype 1                |
| chr2L             | 18051917 | 18052017 | FBgn0000638_FB         | -      | sense            | FBgn0243486             | reduced ocelli                                        |
| chr2L             | 19208084 | 19208185 | FBgn0002698_mdg3       | +      | antisense        | FBgn0015380             | derailed                                              |
| chr2L             | 19606191 | 19606291 | FBgn0000005_297        | +      | antisense        | FBgn0000464             | Leukocyte-antigen-related-like                        |
| chr2R             | 5850464  | 5850564  | FBgn0000155_road       | +      | sense            | FBgn0033466             | Peptidyl-alpha-hydroxyglycine alpha-amidating lyase 1 |
| chr2R             | 6323927  | 6324027  | FBgn0061485_rovers     | +      | sense            | FBgn0033523,FBgn0262114 |                                                       |
| chr2R             | 8368693  | 8368793  | FBgn0000155_road       | -      | sense            | FBgn0033744             |                                                       |
| chr2R             | 8530163  | 8530263  | FBgn0000004_17.6       | -      | sense            | FBgn0033760             |                                                       |
| chr2R             | 87711081 | 87711181 | FBgn0000155_road       | -      | antisense        | FBgn0002069             | Aspartyl-tRNA synthetase                              |
| chr2R             | 10502619 | 10502719 | FBgn0067380_invader6   | +      | sense            | FBgn0026427             |                                                       |
| chr3L             | 1559891  | 1559991  | FBgn0000349_copia      | -      | sense            | FBgn0035233,FBgn0035235 |                                                       |
| chr3L             | 3902821  | 3902921  | FBgn0001207_HMS-Beagle | -      | antisense        | FBgn0003943             | Ubiquitin-63E                                         |
| chr3L             | 6320214  | 6320397  | FBgn0026065_1defix     | -      | sense            | FBgn0041624             | Odorant receptor 65b                                  |
| chr3L             | 9399329  | 9399429  | FBgn0000155_road       | +      | antisense        | FBgn0035986             |                                                       |
| chr3L             | 9444697  | 9444797  | FBgn0044355_Quasimodo  | -      | sense            | FBgn0035996             |                                                       |
| chr3L             | 12133342 | 12133442 | FBgn0000349_copia      | -      | sense            | FBgn0036257             | Rho GTPase-activating protein 68F                     |
| chr3L             | 14660017 | 14660117 | FBgn0000481_Doc        | +      | sense            | FBgn0041604             | dally-like                                            |
| chr3L             | 17474151 | 17474251 | FBgn0003007_opus       | +      | antisense        | FBgn0036731             |                                                       |
| chr3L             | 20420598 | 20420698 | FBgn0000155_road       | +      | sense            | FBgn0036987,FBgn0036988 | Transmembrane protein 104 homolog                     |
| chr3R             | 3576205  | 3576305  | FBgn0000155_road       | -      | antisense        | FBgn0037513             |                                                       |
| chr3R             | 5408606  | 5408706  | FBgn0005384_3518       | +      | sense            | FBgn0037717,FBgn0053654 |                                                       |
| chr3R             | 7617657  | 7617757  | FBgn0000155_road       | +      | sense            | FBgn0025802             | SET domain binding factor                             |
| chr3R             | 12101043 | 12101143 | FBgn0000005_297        | -      | antisense        | FBgn0250823             | gilgamesh                                             |
| chr3R             | 12294643 | 12294643 | FBgn0001249_i-element  | -      | sense            | FBgn0250754             |                                                       |
| chr3R             | 15026475 | 15026575 | FBgn0043055_lvk        | +      | sense            | FBgn0051475             |                                                       |
| chr3R             | 17001743 | 17001870 | FBgn0000638_FB         | -      | antisense        | FBgn0025803             | SNF4/AMP-activated protein kinase gamma subunit       |
| chr3R             | 21677552 | 21677652 | FBgn0000155_road       | -      | sense            | FBgn0039379             |                                                       |
| chr3R             | 25874141 | 25874241 | FBgn0000155_road       | -      | antisense        | FBgn0039741             |                                                       |
| chr4              | 355258   | 355358   | FBgn0000155_road       | +      | antisense        | FBgn0259214             |                                                       |
| chrU              | 2929947  | 2930046  | FBgn0000481_Doc        | -      | sense            | FBgn0085520             |                                                       |
| chrX              | 1244548  | 1244648  | FBgn0000006_412        | -      | antisense        | FBgn0024365             |                                                       |
| chrX              | 3979121  | 3979221  | FBgn0000481_Doc        | +      | antisense        | FBgn0263772             |                                                       |
| chrX              | 14147521 | 14147621 | FBgn0000199_blood      | +      | antisense        | FBgn0002873             | mushroom body defect                                  |
| chrX              | 14152429 | 14152530 | FBgn0040267_Transpac   | +      | antisense        | FBgn0002873             | mushroom body defect                                  |
| chrX              | 18466687 | 18466787 | FBgn0001167_gypsy      | -      | sense            | FBgn0000242             | Beadex                                                |

| intronic insertions |          |          |                         |        |                  |                         |                                            |
|---------------------|----------|----------|-------------------------|--------|------------------|-------------------------|--------------------------------------------|
| chr                 | start    | end      | transposonName          | strand | transposonStrand | gene                    | gene fullname                              |
| chr2L               | 167031   | 167131   | FBgn0000199_blood       | -      | antisense        | FBgn0016977             | split ends                                 |
| chr2L               | 6311078  | 6311178  | FBgn0005773_Bari1       | +      | antisense        | FBgn0053531             | Discoidin domain receptor                  |
| chr2L               | 7551610  | 7551710  | FBgn0000155_roo         | -      | sense            | FBgn0085403             | Rappap1                                    |
| chr2L               | 7788913  | 7789013  | FBgn0000005_297         | +      | antisense        | FBgn0031948             |                                            |
| chr2L               | 8911266  | 8911366  | FBgn0063897_Stalker4    | +      | sense            | FBgn0085427             |                                            |
| chr2L               | 8911266  | 8911366  | FBgn0003519_Stalker     | +      | sense            | FBgn0085427             |                                            |
| chr2L               | 14227207 | 14227307 | FBgn0000007_1731        | +      | sense            | FBgn0016930             | smell impaired 35A                         |
| chr2L               | 17819966 | 17820065 | FBgn0000349_copia       | -      | sense            | FBgn0262018             | Cadherin-N2                                |
| chr2L               | 18521463 | 18521563 | FBgn0063897_Stalker4    | +      | antisense        | FBgn0032685             |                                            |
| chr2L               | 18521463 | 18521563 | FBgn0003519_Stalker     | +      | antisense        | FBgn0032685             |                                            |
| chr2L               | 19357124 | 19357224 | FBgn0000652_F-element   | +      | antisense        | FBgn0024245             | doughnut on 2                              |
| chr2L               | 21764851 | 21764951 | FBgn0002697_mdg1        | -      | sense            | FBgn0051612             |                                            |
| chr2R               | 236865   | 236965   | FBgn0043055_lvk         | +      | sense            | FBgn0260798             | G protein-coupled receptor kinase 1        |
| chr2R               | 7060624  | 7060777  | FBgn0002697_mdg1        | -      | sense            | FBgn0003396             | schnurri                                   |
| chr2R               | 12571449 | 12571569 | FBgn0002697_mdg1        | +      | antisense        | FBgn0050463             |                                            |
| chr2R               | 14360560 | 14360660 | FBgn0000652_F-element   | -      | antisense        | FBgn0028496             |                                            |
| chr2R               | 15506829 | 15507018 | FBgn0000638_FB          | +      | sense            | FBgn0003435             | smooth                                     |
| chr2R               | 16464761 | 16464861 | FBgn0010302_Burdock     | -      | sense            | FBgn0028622             | quasimodo                                  |
| chr2R               | 16780579 | 16780679 | FBgn0026065_ldefix      | -      | sense            | FBgn0015524             | orthopedia                                 |
| chr2R               | 18787072 | 18787172 | FBgn0000349_copia       | +      | antisense        | FBgn0034797             | nahoda                                     |
| chr2R               | 20977572 | 20977672 | FBgn0000638_FB          | -      | sense            | FBgn0003715             |                                            |
| chr2RHet            | 1738882  | 1738982  | FBgn0000349_copia       | +      | antisense        | FBgn0020908             | Sarcoplasmic calcium-binding protein 1     |
| chr2RHet            | 1883038  | 1883138  | FBgn0063897_Stalker4    | +      | antisense        | FBgn0260995             |                                            |
| chr2RHet            | 1883038  | 1883138  | FBgn0003519_Stalker     | +      | antisense        | FBgn0260995             |                                            |
| chr2RHet            | 3151985  | 3152085  | FBgn0000005_297         | +      | antisense        | FBgn0262124             | unextended                                 |
| chr3L               | 1169329  | 1169429  | FBgn0000224_BS          | -      | sense            | FBgn0025525             | bric a brac 2                              |
| chr3L               | 2382353  | 2382453  | FBgn0000004_17.6        | -      | antisense        | FBgn0035338,FBgn0261551 |                                            |
| chr3L               | 2438252  | 2438352  | FBgn0000481_Doc         | -      | sense            | FBgn0261551             |                                            |
| chr3L               | 3343281  | 3343381  | FBgn0000155_roo         | -      | antisense        | FBgn0004167             | karst                                      |
| chr3L               | 5003744  | 5003844  | FBgn0043969_diver       | -      | antisense        | FBgn0005775             | Connectin                                  |
| chr3L               | 5269184  | 5269284  | FBgn0000005_297         | -      | antisense        | FBgn0052423             | alan shepard                               |
| chr3L               | 6470991  | 6471091  | FBgn0001167_gypsy       | +      | antisense        | FBgn0261801             |                                            |
| chr3L               | 8521510  | 8521610  | FBgn0000155_roo         | -      | antisense        | FBgn0024236             | fear-of-intimacy                           |
| chr3L               | 10646082 | 10646182 | FBgn0001249_l-element   | -      | antisense        | FBgn0052066             |                                            |
| chr3L               | 14487533 | 14487633 | FBgn0002698_mdg3        | +      | sense            | FBgn0087007             | big bang                                   |
| chr3L               | 15596598 | 15596698 | FBgn0063429_invader2    | +      | antisense        | FBgn0036518             | RhoGAP71E                                  |
| chr3L               | 15617853 | 15617953 | FBgn0063917_McClintock  | -      | sense            | FBgn0259236             | comm3                                      |
| chr3L               | 15991804 | 15991904 | FBgn0000638_FB          | -      | antisense        | FBgn0036556             | Limpet                                     |
| chr3L               | 16730090 | 16730190 | FBgn0001167_gypsy       | -      | antisense        | FBgn0036659             |                                            |
| chr3L               | 16868582 | 16868746 | FBgn0001283_jockey      | +      | antisense        | FBgn0261565             |                                            |
| chr3L               | 17200666 | 17200919 | FBgn0000005_297         | +      | antisense        | FBgn0260943             | RNA-binding protein 6                      |
| chr3L               | 17708204 | 17708342 | FBgn0043055_lvk         | +      | antisense        | FBgn0052183             | Ccn                                        |
| chr3L               | 19369673 | 19369773 | FBgn0000005_297         | +      | antisense        | FBgn0052206             |                                            |
| chr3L               | 23276051 | 23276151 | FBgn0000155_roo         | -      | sense            | FBgn0037212             | nicotinic Acetylcholine Receptor alpha 80B |
| chr3LHet            | 1539109  | 1539209  | FBgn0040267_Transpac    | +      | sense            | FBgn0085612             |                                            |
| chr3R               | 5421583  | 5421683  | FBgn0000638_FB          | -      | antisense        | FBgn0037720             |                                            |
| chr3R               | 7598601  | 7598701  | FBgn0000155_roo         | -      | sense            | FBgn0086910             | lethal (3) neo38                           |
| chr3R               | 8965310  | 8965410  | FBgn0000155_roo         | +      | antisense        | FBgn0038118,FBgn0260793 | timeout                                    |
| chr3R               | 10293337 | 10293437 | FBgn0000004_17.6        | +      | sense            | FBgn0086901             | crossveinless c                            |
| chr3R               | 10401492 | 10401592 | FBgn0000006_412         | -      | antisense        | FBgn0038244             |                                            |
| chr3R               | 14333327 | 14333427 | FBgn0000006_412         | +      | sense            | FBgn0004652             | fruitless                                  |
| chr3R               | 14421607 | 14421707 | FBgn0000155_roo         | +      | sense            | FBgn0038629,FBgn0263974 | qin                                        |
| chr3R               | 17476805 | 17476905 | FBgn0046110_Juan        | +      | sense            | FBgn0011766             | E2F transcription factor                   |
| chr3R               | 19895533 | 19895633 | FBgn0000005_297         | -      | sense            | FBgn0053100             | 4EHP                                       |
| chr3R               | 25612177 | 25612277 | FBgn0010302_Burdock     | -      | antisense        | FBgn0001297             | kayak                                      |
| chr3RHet            | 388880   | 388979   | FBgn0040267_Transpac    | +      | sense            | FBgn0040034             |                                            |
| chr3RHet            | 1200593  | 1200693  | FBgnnnnnnnn_HMS-Beagle2 | +      | antisense        | FBgn0058232             |                                            |
| chr3RHet            | 1261015  | 1261115  | FBgn0000481_Doc         | +      | antisense        | FBgn0058232             |                                            |
| chrU                | 125084   | 125184   | FBgn0001249_l-element   | -      | antisense        | FBgn0058378             |                                            |
| chrU                | 455427   | 455527   | FBgn0063428_invader3    | -      | antisense        | FBgn0261338             |                                            |
| chrX                | 1461735  | 1461835  | FBgn0000155_roo         | -      | antisense        | FBgn0025390             | Mucin related 2B                           |
| chrX                | 1461738  | 1461838  | FBgn0000155_roo         | -      | sense            | FBgn0025390             | Mucin related 2B                           |
| chrX                | 2803098  | 2803198  | FBgn0000155_roo         | -      | antisense        | FBgn0028369             | kin of irre                                |
| chrX                | 3170814  | 3170914  | FBgn0043055_lvk         | -      | antisense        | FBgn0000479             | dunce                                      |
| chrX                | 3647494  | 3647594  | FBgn0046110_Juan        | -      | sense            | FBgn0086899             | Tousled-like kinase                        |
| chrX                | 4238801  | 4238901  | FBgn0000155_roo         | +      | sense            | FBgn0262738             | no receptor potential A                    |
| chrX                | 8388138  | 8388238  | FBgn0000652_F-element   | -      | sense            | FBgn0053181             |                                            |
| chrX                | 12081980 | 12082080 | FBgn0000199_blood       | +      | antisense        | FBgn0259240             | Tenascin accessory                         |
| chrX                | 13169418 | 13169518 | FBgn0000005_297         | -      | sense            | FBgn0041210             | HDAC4                                      |
| chrX                | 14699692 | 14699792 | FBgn0043055_lvk         | -      | antisense        | FBgn0003301             | rutabaga                                   |
| chrX                | 15296435 | 15296535 | FBgn0000004_17.6        | +      | sense            | FBgn0263257             | CNG channel-like                           |
| chrX                | 19327236 | 19327336 | FBgn0005773_Bari1       | +      | sense            | FBgn0031016             | kekkon5                                    |
| chrX                | 21125471 | 21125571 | FBgn0026065_ldefix      | +      | antisense        | FBgn0052521             |                                            |

| promoter insertions |          |          |                      |        |                  |             |                 |
|---------------------|----------|----------|----------------------|--------|------------------|-------------|-----------------|
| chr                 | start    | end      | transposonName       | strand | transposonStrand | gene        | distance to TSS |
| chr2R               | 15051397 | 15051497 | FBgn0000155_roo      | -      | sense            | FBgn0034420 | -254            |
| chr3R               | 485015   | 485115   | FBgn0000224_BS       | -      | sense            | FBgn0263346 | -289            |
| chr3R               | 11570346 | 11570446 | FBgn0063897_Stalker4 | -      | antisense        | FBgn0038355 | -29             |
| chr3R               | 11570346 | 11570446 | FBgn0003519_Stalker  | -      | antisense        | FBgn0038355 | -29             |
| chrU                | 8541     | 8641     | FBgn0000005_297      | -      | sense            | FBgn0261404 | -796            |

**Table S4.**

GO-term analysis of genes disrupted by  $\alpha\beta$  neuron insertions (from -1k to the end of the gene). The Count column lists the number of genes with insertions in  $\alpha\beta$  neurons for each GO term. The Benjamini FDR column indicates the false discovery rate after multiple-testing correction. GO terms with FDR less than 5% are bold.

| Category      | Term                                                         | Count     | %           | P-Value         | Benjamini FDR   |
|---------------|--------------------------------------------------------------|-----------|-------------|-----------------|-----------------|
| GOTERM_BP_FAT | <b>cell morphogenesis involved in neuron differentiation</b> | <b>10</b> | <b>11.2</b> | <b>1.90E-04</b> | <b>2.70E-02</b> |
| GOTERM_BP_FAT | cell motion                                                  | 10        | 11.2        | 2.90E-04        | 2.80E-02        |
| GOTERM_BP_FAT | <b>cell morphogenesis involved in differentiation</b>        | <b>10</b> | <b>11.2</b> | <b>2.70E-04</b> | <b>3.10E-02</b> |
| GOTERM_BP_FAT | cell projection morphogenesis                                | 10        | 11.2        | 4.10E-04        | 3.40E-02        |
| GOTERM_BP_FAT | neuron projection development                                | 10        | 11.2        | 1.80E-04        | 3.50E-02        |
| GOTERM_BP_FAT | neuron differentiation                                       | 11        | 12.4        | 5.80E-04        | 3.70E-02        |
| GOTERM_BP_FAT | cell part morphogenesis                                      | 10        | 11.2        | 5.20E-04        | 3.80E-02        |
| GOTERM_BP_FAT | neuron development                                           | 10        | 11.2        | 7.40E-04        | 4.20E-02        |
| GOTERM_BP_FAT | axonogenesis                                                 | 9         | 10.1        | 7.50E-05        | 4.30E-02        |
| GOTERM_CC_FAT | plasma membrane                                              | 16        | 18          | 5.20E-04        | 4.70E-02        |
| GOTERM_BP_FAT | cell projection organization                                 | 10        | 11.2        | 1.10E-03        | 5.00E-02        |
| GOTERM_BP_FAT | <b>neuron projection morphogenesis</b>                       | <b>10</b> | <b>11.2</b> | <b>1.80E-04</b> | <b>5.00E-02</b> |
| GOTERM_BP_FAT | cell morphogenesis                                           | 11        | 12.4        | 1.10E-03        | 5.40E-02        |
| GOTERM_BP_FAT | Wnt receptor signaling pathway                               | 5         | 5.6         | 1.60E-03        | 7.00E-02        |



**Table S5.**

Genes represented in each significant GO-term in  $\alpha\beta$  neuron insertions.

**cell morphogenesis involved in neuron differentiation; cell morphogenesis involved in differentiation; cell projection morphogenesis; neuron projection development; cell part morphogenesis; neuron development; cell projection organization; neuron projection morphogenesis**

FBgn0005775 Connectin  
 FBgn0011766 E2F transcription factor  
 FBgn0000464 Leukocyte-antigen-related-like  
 FBgn0041604 dally-like  
 FBgn0015380 derailed  
 FBgn0024245 doughnut on 2  
 FBgn0000479 dunce  
 FBgn0003301 rutabaga  
 FBgn0003435 smooth  
 FBgn0016977 split ends

**transposon**

FBgn0043969\_diver  
 FBgn0046110\_Juan  
 FBgn0000005\_297  
 FBgn0000481\_Doc  
 FBgn0002698\_mdg3  
 FBgn0000652\_F-element  
 FBgn0043055\_lvk  
 FBgn0043055\_lvk  
 FBgn0000638\_FB  
 FBgn0000199\_blood

**neuron differentiation**

FBgn0005775 Connectin  
 FBgn0011766 E2F transcription factor  
 FBgn0000464 Leukocyte-antigen-related-like  
 FBgn0041604 dally-like  
 FBgn0015380 derailed  
 FBgn0024245 doughnut on 2  
 FBgn0000479 dunce  
 FBgn0001297 kayak  
 FBgn0003301 rutabaga  
 FBgn0003435 smooth  
 FBgn0016977 split ends

FBgn0010302\_Burdock

**axonogenesis**

FBgn0005775 Connectin  
 FBgn0000464 Leukocyte-antigen-related-like  
 FBgn0041604 dally-like  
 FBgn0015380 derailed  
 FBgn0024245 doughnut on 2  
 FBgn0000479 dunce  
 FBgn0003301 rutabaga  
 FBgn0003435 smooth  
 FBgn0016977 split ends

**cell motion**

FBgn0000464 Leukocyte-antigen-related-like  
 FBgn0086901 crossveinless c  
 FBgn0041604 dally-like  
 FBgn0015380 derailed  
 FBgn0024245 doughnut on 2  
 FBgn0024236 fear-of-intimacy  
 FBgn0250823 gilgamesh  
 FBgn0001297 kayak  
 FBgn0003435 smooth  
 FBgn0016977 split ends

FBgn0000004\_17.6

FBgn0000155\_roo  
 FBgn0000005\_297

**plasma membrane**

FBgn0005775 Connectin  
 FBgn0033744 Dmel\_CG12370  
 FBgn0259214 Dmel\_CG42314  
 FBgn0000464 Leukocyte-antigen-related-like  
 FBgn0259111 Na[+]-driven anion exchanger 1  
 FBgn0033466 Peptidyl-alpha-hydroxyglycine alpha-amidating  
 FBgn0259240 Tenascin accessory  
 FBgn0087007 big bang  
 FBgn0015380 derailed  
 FBgn0024245 doughnut on 2  
 FBgn0024236 fear-of-intimacy  
 FBgn0250823 gilgamesh  
 FBgn0004167 karst  
 FBgn0028369 kin of irre  
 FBgn0037212 nicotinic Acetylcholine Receptor alpha 80B  
 FBgn0003301 rutabaga

FBgn0000155\_roo  
 FBgn0000155\_roo  
 FBgn0044355\_Quasimodo  
 FBgn0000155\_roo  
 FBgn0000199\_blood  
 FBgn0002698\_mdg3  
 FBgn0000155\_roo  
 FBgn0000155\_roo  
 FBgn0000155\_roo

**Table S6.**

Genomic locations of new insertions in other brain cells.

| FLYBASE_GENE_ID | Gene Name                                    |
|-----------------|----------------------------------------------|
| FBgn0000479     | dunce                                        |
| FBgn0000578     | enabled                                      |
| FBgn0001269     | invected                                     |
| FBgn0003295     | roughoid                                     |
| FBgn0003415     | skuld                                        |
| FBgn0004168     | Serotonin receptor 1A                        |
| FBgn0004198     | cut                                          |
| FBgn0005410     | strawberry notch                             |
| FBgn0005633     | flightin                                     |
| FBgn0010247     | Poly-(ADP-ribose) polymerase                 |
| FBgn0011206     | boule                                        |
| FBgn0011259     | Semaphorin-1A                                |
| FBgn0011288     | Synapse protein 25                           |
| FBgn0011829     | Ret oncogene                                 |
| FBgn0013467     | igloo                                        |
| FBgn0013997     | Neurexin IV                                  |
| FBgn0014343     | mirror                                       |
| FBgn0014455     | Adenosylhomocysteinase at 13                 |
| FBgn0015561     | unplugged                                    |
| FBgn0015600     | toucan                                       |
| FBgn0020305     | dribble                                      |
| FBgn0023171     | ribonuclease H1                              |
| FBgn0023511     | Dmel_CG3810                                  |
| FBgn0025726     | Dmel_CG2999                                  |
| FBgn0027539     | Dmel_CG5807                                  |
| FBgn0028866     | Dmel_CG18420                                 |
| FBgn0030073     | Dmel_CG10962                                 |
| FBgn0030898     | Dmel_CG12611                                 |
| FBgn0031195     | Dmel_CG17600                                 |
| FBgn0031730     | Dmel_CG7236                                  |
| FBgn0031902     | Protein Wnt                                  |
| FBgn0032120     | Dmel_CG33298                                 |
| FBgn0032211     | Dmel_CG13138                                 |
| FBgn0032362     | Dmel_CG14928                                 |
| FBgn0032471     | Dmel_CG5122                                  |
| FBgn0032627     | Dmel_CG12621                                 |
| FBgn0033524     | Probable cytochrome P450 49a1                |
| FBgn0035173     | Dmel_CG13907                                 |
| FBgn0035266     | Dmel_CG7995                                  |
| FBgn0035888     | Dmel_CG7120                                  |
| FBgn0036433     | Dmel_CG9628                                  |
| FBgn0036511     | Dmel_CG6498                                  |
| FBgn0037057     | Dmel_CG10512                                 |
| FBgn0037130     | Syntrophin-like 1                            |
| FBgn0037215     | Dmel_CG12582                                 |
| FBgn0037427     | Osiris 17                                    |
| FBgn0037635     | Dmel_CG9837                                  |
| FBgn0038680     | Probable cytochrome P450 12a5, mitochondrial |
| FBgn0038878     | Dmel_CG3301                                  |
| FBgn0038930     | Dmel_CG5778                                  |
| FBgn0039016     | Dicer-1                                      |
| FBgn0039494     | Gram-positive Specific Serine protease       |
| FBgn0039862     | Dmel_CG1804                                  |
| FBgn0039900     | Dmel_CG2381                                  |
| FBgn0050087     | Dmel_CG30087                                 |
| FBgn0050296     | Dmel_CG30296                                 |
| FBgn0050468     | Dmel_CG30468                                 |
| FBgn0051524     | Dmel_CG31524                                 |
| FBgn0052138     | Formin-like protein CG32138                  |
| FBgn0052676     | Dmel_CG32676                                 |
| FBgn0052758     | Dmel_CG32758                                 |
| FBgn0053202     | Dmel_CG33202                                 |
| FBgn0053337     | Dmel_CG33337                                 |
| FBgn0053543     | Dmel_CG33543                                 |
| FBgn0053554     | Transcription-associated protein 1           |
| FBgn0053555     | bitesize                                     |
| FBgn0058006     | Dmel_CG40006                                 |
| FBgn0058178     | Dmel_CG40178                                 |
| FBgn0083950     | Dmel_CG34114                                 |
| FBgn0083975     | Dmel_CG34139                                 |
| FBgn0085399     | Dmel_CG34370                                 |
| FBgn0086604     | Dmel_CG12484                                 |
| FBgn0086675     | found in neurons                             |
| FBgn0086758     | Chronologically inappropriate morphogenesis  |
| FBgn0259239     | Dmel_CG42337                                 |
| FBgn0259244     | Dmel_CG42342                                 |
| FBgn0260642     | Antennapedia                                 |
| FBgn0260941     | Dmel_CG42318                                 |
| FBgn0260943     | RNA-binding protein Musashi homolog Rbp6     |
| FBgn0260959     | Microcephalin                                |
| FBgn0260987     | Dmel_CG17436                                 |
| FBgn0261549     |                                              |
| FBgn0262103     |                                              |
| FBgn0263102     |                                              |
| FBgn0263873     |                                              |
| FBgn0261509     |                                              |
| FBgn0261649     |                                              |
| FBgn0261698     |                                              |
| FBgn0262362     |                                              |
| FBgn0262738     |                                              |
| FBgn0261642     |                                              |
| FBgn0261914     |                                              |
| FBgn0263391     |                                              |
| FBgn0058232     |                                              |

**Table S7.**

GO-term analysis of genes disrupted in other brain cells. No term reaches statistical significance.

| Category      | Term                                           | Count | %    | P-Value  | Benjamini FDR |
|---------------|------------------------------------------------|-------|------|----------|---------------|
| GOTERM_BP_FAT | synaptic vesicle transport                     | 5     | 6.2  | 1.80E-03 | 6.40E-01      |
| GOTERM_BP_FAT | synaptic vesicle exocytosis                    | 4     | 4.9  | 3.70E-03 | 6.60E-01      |
| GOTERM_CC_FAT | plasma membrane part                           | 6     | 7.4  | 6.30E-02 | 7.00E-01      |
| GOTERM_BP_FAT | exocytosis                                     | 4     | 4.9  | 6.70E-03 | 7.30E-01      |
| GOTERM_CC_FAT | plasma membrane                                | 9     | 11.1 | 4.90E-02 | 7.50E-01      |
| GOTERM_BP_FAT | neurotransmitter transport                     | 4     | 4.9  | 3.60E-02 | 7.60E-01      |
| GOTERM_CC_FAT | coated vesicle                                 | 3     | 3.7  | 6.30E-02 | 7.70E-01      |
| GOTERM_BP_FAT | compound eye cone cell fate commitment         | 2     | 2.5  | 5.10E-02 | 7.70E-01      |
| GOTERM_BP_FAT | regulation of transcription, DNA-dependent     | 8     | 9.9  | 6.10E-02 | 7.70E-01      |
| GOTERM_BP_FAT | wing disc pattern formation                    | 3     | 3.7  | 5.90E-02 | 7.70E-01      |
| GOTERM_BP_FAT | cyclic-nucleotide-mediated signaling           | 2     | 2.5  | 9.40E-02 | 7.70E-01      |
| GOTERM_BP_FAT | cell morphogenesis involved in differentiation | 5     | 6.2  | 9.70E-02 | 7.80E-01      |
| GOTERM_BP_FAT | secretion                                      | 4     | 4.9  | 3.50E-02 | 7.80E-01      |
| GOTERM_BP_FAT | regulation of RNA metabolic process            | 8     | 9.9  | 9.30E-02 | 7.80E-01      |
| GOTERM_CC_FAT | clathrin-coated vesicle                        | 3     | 3.7  | 4.00E-02 | 7.80E-01      |
| GOTERM_BP_FAT | actin filament-based process                   | 4     | 4.9  | 5.00E-02 | 7.80E-01      |
| GOTERM_BP_FAT | secretion by cell                              | 4     | 4.9  | 3.10E-02 | 7.80E-01      |
| GOTERM_BP_FAT | regionalization                                | 7     | 8.6  | 4.60E-02 | 7.80E-01      |
| GOTERM_BP_FAT | cell-cell signaling                            | 5     | 6.2  | 3.30E-02 | 7.80E-01      |
| GOTERM_BP_FAT | cell morphogenesis                             | 7     | 8.6  | 4.10E-02 | 7.80E-01      |
| GOTERM_BP_FAT | open tracheal system development               | 4     | 4.9  | 5.80E-02 | 7.80E-01      |
| GOTERM_BP_FAT | respiratory system development                 | 4     | 4.9  | 5.80E-02 | 7.80E-01      |
| GOTERM_BP_FAT | neurological system process                    | 7     | 8.6  | 9.30E-02 | 7.90E-01      |
| GOTERM_BP_FAT | cAMP-mediated signaling                        | 2     | 2.5  | 8.90E-02 | 7.90E-01      |
| GOTERM_BP_FAT | pattern specification process                  | 7     | 8.6  | 5.70E-02 | 7.90E-01      |
| GOTERM_BP_FAT | actin cytoskeleton organization                | 4     | 4.9  | 5.00E-02 | 7.90E-01      |
| GOTERM_BP_FAT | peripheral nervous system development          | 3     | 3.7  | 9.20E-02 | 7.90E-01      |
| GOTERM_BP_FAT | cell fate commitment                           | 5     | 6.2  | 4.50E-02 | 7.90E-01      |

**Table S8.**

$\chi^2$  test reveals the distribution of de novo insertions in  $\alpha\beta$  neurons, other brain cells and ovary is statistically different from the positions of transposons annotated in the published genome.

|                                    | Transposons in the reference genome (measured) | $\alpha\beta$ neurons | rest of brain | ovary-embryo |
|------------------------------------|------------------------------------------------|-----------------------|---------------|--------------|
| exon                               | 258                                            | 35                    | 42            | 823          |
| intron                             | 11110                                          | 68                    | 52            | 1538         |
| promoter                           | 502                                            | 5                     | 0             | 152          |
| intergenic                         | 33008                                          | 107                   | 106           | 1347         |
| total                              | 44878                                          | 215                   | 200           | 3860         |
| <b>CHISQ.TEST against measured</b> |                                                | 8.75E-181             | 2.63E-273     | <2E-16       |

**Table S9.**

GO-term analysis of genes disrupted in ovary cells. 102 genes were randomly sampled from the ovary data to normalize numbers to those in the brain samples. No term reaches statistical significance.

| Category      | Term                  | Count | %    | P-Value  | Benjamini FDR |
|---------------|-----------------------|-------|------|----------|---------------|
| GOTERM_BP_FAT | intrinsic to membrane | 15    | 16.5 | 2.90E-02 | 7.20E-01      |
| GOTERM_BP_FAT | plasma membrane       | 10    | 11   | 4.40E-02 | 7.30E-01      |
| GOTERM_CC_FAT | integral to membrane  | 15    | 16.5 | 2.50E-02 | 8.90E-01      |

**Table S10.**

Genes receiving de novo transposon insertions in  $\alpha\beta$  neurons are likely expressed in  $\alpha\beta$  neurons. Promoter fragments from 20 of the genes receiving transposon insertions in  $\alpha\beta$  have been analyzed for their ability to direct neuron specific gene expression as transgenic fly lines (49). 18 of the 20 confer expression in MB  $\alpha\beta$  neurons (black text). One does not label anything in the brain and the other labels  $\alpha'\beta'$  neurons (red text).

| <i>Gene</i>                      | <i>FlyLight GAL4 transgenic line(s)</i> |
|----------------------------------|-----------------------------------------|
| dnc                              | R12C07                                  |
| rut                              | R14H06, R15E09                          |
| mud                              | R29B12                                  |
| drl                              | R26E12 $\alpha'\beta'$ labeled          |
| nAChRalpha 80B                   | R18G03, R18G05                          |
| gprk                             |                                         |
| cngl                             | R89D07                                  |
| GABA B-R1                        | R74G01, R73G03                          |
| E2F                              | R47B08, R47B10, R48C03                  |
| kayak                            | R42A04                                  |
| spen                             |                                         |
| smooth                           | R15G02 no brain expression              |
| gilgamesh                        | R27E01, R27E03, R28C09, R28C10          |
| fear of intimacy                 |                                         |
| doughnut on 2                    |                                         |
| dally-Like (dlp)                 | R53H05, R52H12, R54B01                  |
| cv-c                             |                                         |
| Lar                              |                                         |
| Ndae1                            |                                         |
| kin of irre                      |                                         |
| karst                            |                                         |
| big bang                         |                                         |
| Ten-A                            |                                         |
| Pal1                             |                                         |
| connectin                        |                                         |
| CG12370                          | R19A04                                  |
| CG42314                          |                                         |
| <b>Non-GOterm clustered hits</b> |                                         |
| beadex                           | R41C08, R42C07                          |
| SNF4gamma                        | R30H03, R33A06                          |
| Sbf                              |                                         |
| RhoGAP68F                        |                                         |
| limpet                           | R27C02                                  |
| ccn                              | R53C04, R53C09                          |
| norpA                            | R12B05, R14A07, R14D06, R14H01          |
| tlk                              |                                         |
| mur2B                            |                                         |
| HDAC4                            |                                         |
| kek5                             |                                         |
| Timeout                          |                                         |
| shepard                          |                                         |
| nahoda                           |                                         |
| bab2                             | R36E08                                  |
| uex                              |                                         |
| orthopedia                       | R83E01, R83E02                          |
| quasimodo                        |                                         |
| Smi35A                           |                                         |
| scp1                             |                                         |



## References

1. R. Cordaux, M. A. Batzer, *Nat Rev Genet* **10**, 691 (2009).
2. H. H. J. Kazazian, *Science* **303**, 1626 (2004).
3. J. S. Kaminker *et al.*, *Genome Biol* **3**, RESEARCH0084 (2002).
4. N. G. Coufal *et al.*, *Nature* **460**, 1127 (2009).
5. J. K. Baillie *et al.*, *Nature* **479**, 534 (2011).
6. A. R. Muotri *et al.*, *Nature* **435**, 903 (2005).
7. A. R. Muotri, F. H. Gage, *Nature* **441**, 1087 (2006).
8. T. Singer, M. J. McConnell, M. C. Marchetto, N. G. Coufal, F. H. Gage, *Trends Neurosci* **33**, 345 (2010).
9. F. H. Gage, A. R. Muotri, *Sci Am* **306**, 26 (2012).
10. A. L. Blum, W. Li, M. Cressy, J. Dubnau, *Curr Biol* **19**, 1341 (2009).
11. S. Trannoy, C. Redt-Clouet, J. M. Dura, T. Preat, *Curr Biol* **21**, 1647 (2011).
12. M. J. Krashes, A. C. Keene, B. Leung, J. D. Armstrong, S. Waddell, *Neuron* **53**, 103 (2007).
13. D. Yu, D. B. Akalal, R. L. Davis, *Neuron* **52**, 845 (2006).
14. E. Nagoshi *et al.*, *Nat Neurosci* **13**, 60 (2010).
15. Y. Shang, L. C. Griffith, M. Rosbash, *Proc Natl Acad Sci U S A* **105**, 19587 (2008).
16. J. Rainer, F. Sanchez-Cabo, G. Stocker, A. Sturn, Z. Trajanoski, *Nucleic Acids Res* **34**, W498 (2006).
17. J. L. Jakubczak, W. D. Burke, T. H. Eickbush, *Proc Natl Acad Sci U S A* **88**, 3295 (1991).
18. A. R. Muotri *et al.*, *Nature* **468**, 443 (2010).
19. C. Li *et al.*, *Cell* **137**, 509 (2009).
20. V. V. Vagin *et al.*, *Science* **313**, 320 (2006).
21. M. C. Siomi, K. Sato, D. Pezic, A. A. Aravin, *Nat Rev Mol Cell Biol* **12**, 246 (2011).
22. M. Ghildiyal *et al.*, *Science* **320**, 1077 (2008).
23. K. Saito, M. C. Siomi, *Dev Cell* **19**, 687 (2010).
24. J. Brennecke *et al.*, *Science* **322**, 1387 (2008).
25. N. Yang, H. H. J. Kazazian, *Nat Struct Mol Biol* **13**, 763 (2006).
26. M. Ghildiyal, P. D. Zamore, *Nat Rev Genet* **10**, 94 (2009).
27. A. A. Aravin *et al.*, *Curr Biol* **11**, 1017 (2001).
28. A. A. Aravin *et al.*, *Mol Cell Biol* **24**, 6742 (2004).
29. M. P. Bozzetti *et al.*, *Proc Natl Acad Sci U S A* **92**, 6067 (1995).
30. J. Brennecke *et al.*, *Cell* **128**, 1089 (2007).
31. L. S. Gunawardane *et al.*, *Science* **315**, 1587 (2007).
32. D. N. Cox *et al.*, *Genes Dev* **12**, 3715 (1998).
33. T. Schupbach, E. Wieschaus, *Genetics* **129**, 1119 (1991).
34. Y. Tomari *et al.*, *Cell* **116**, 831 (2004).
35. J. S. Khurana *et al.*, *Cell* **147**, 1551 (2011).
36. G. D. Evrony *et al.*, *Cell* **151**, 483 (2012).
37. S. M. Tomchik, R. L. Davis, *Neuron* **64**, 510 (2009).
38. Y. Tan, D. Yu, J. Pletting, R. L. Davis, *Neuron* **67**, 810 (2010).

39. C. Moreau-Fauvarque, E. Taillebourg, E. Boissoneau, J. Mesnard, J. M. Dura, *Mech Dev* **78**, 47 (1998).
40. A. Hovhanyan, T. Raabe, *J Neurogenet* **23**, 42 (2009).
41. K. Yasuyama, I. A. Meinertzhagen, F. W. Schurmann, *J Comp Neurol* **445**, 211 (2002).
42. X. Liu, R. L. Davis, *Nat Neurosci* **12**, 53 (2009).
43. S. Waddell, *Trends Neurosci* **33**, 457 (2010).
44. P. Rajasethupathy *et al.*, *Cell* **149**, 693 (2012).
45. J. L. Pitman *et al.*, *Curr Biol* **21**, 855 (2011).
46. P. Stockinger, D. Kvitsiani, S. Rotkopf, L. Tirian, B. J. Dickson, *Cell* **121**, 795 (2005).
47. D. Schmidt *et al.*, *Methods* **48**, 240 (2009).
48. H. Li, R. Durbin, *Bioinformatics* **25**, 1754 (2009).
49. A. Jenett *et al.*, *Cell Rep* **2**, 991 (2012).
